# Supplementary material for: Problemática administrativa del Pacto Andino
Source: Hindawi journal article supplement (doi:10.1155/2023/3610466), 1974-01-01
Supplement: f1 [file 3610466.f1.pdf]

## **Supplementary information**

### **MAGEB2 inhibits the proliferation of human spermatogonial stem cells**

**Supplemental Data:**

**3 Figures**

**1 Table**

## Supplemental Figures

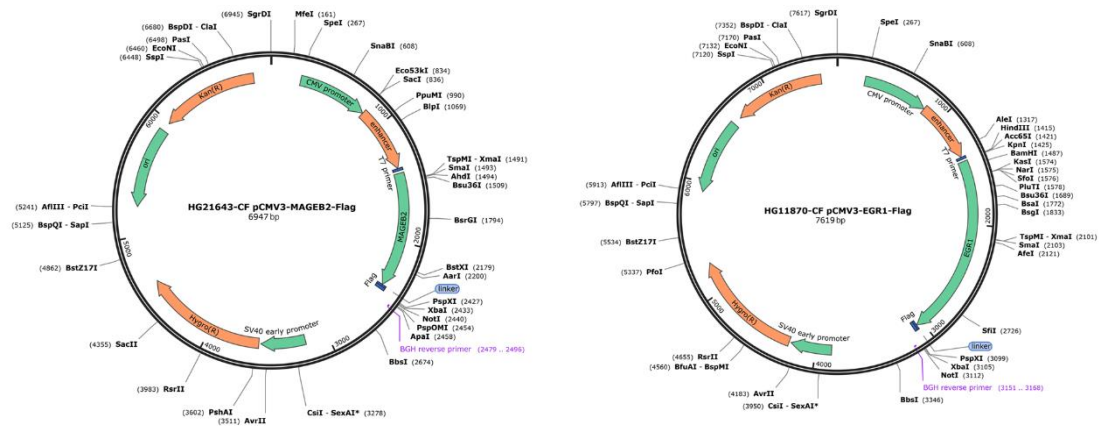

**Supplementary Figure 1: Genetic maps of MAGEB2 and EGR1 expression plasmid inserts.**

## Supplementary Figure 2

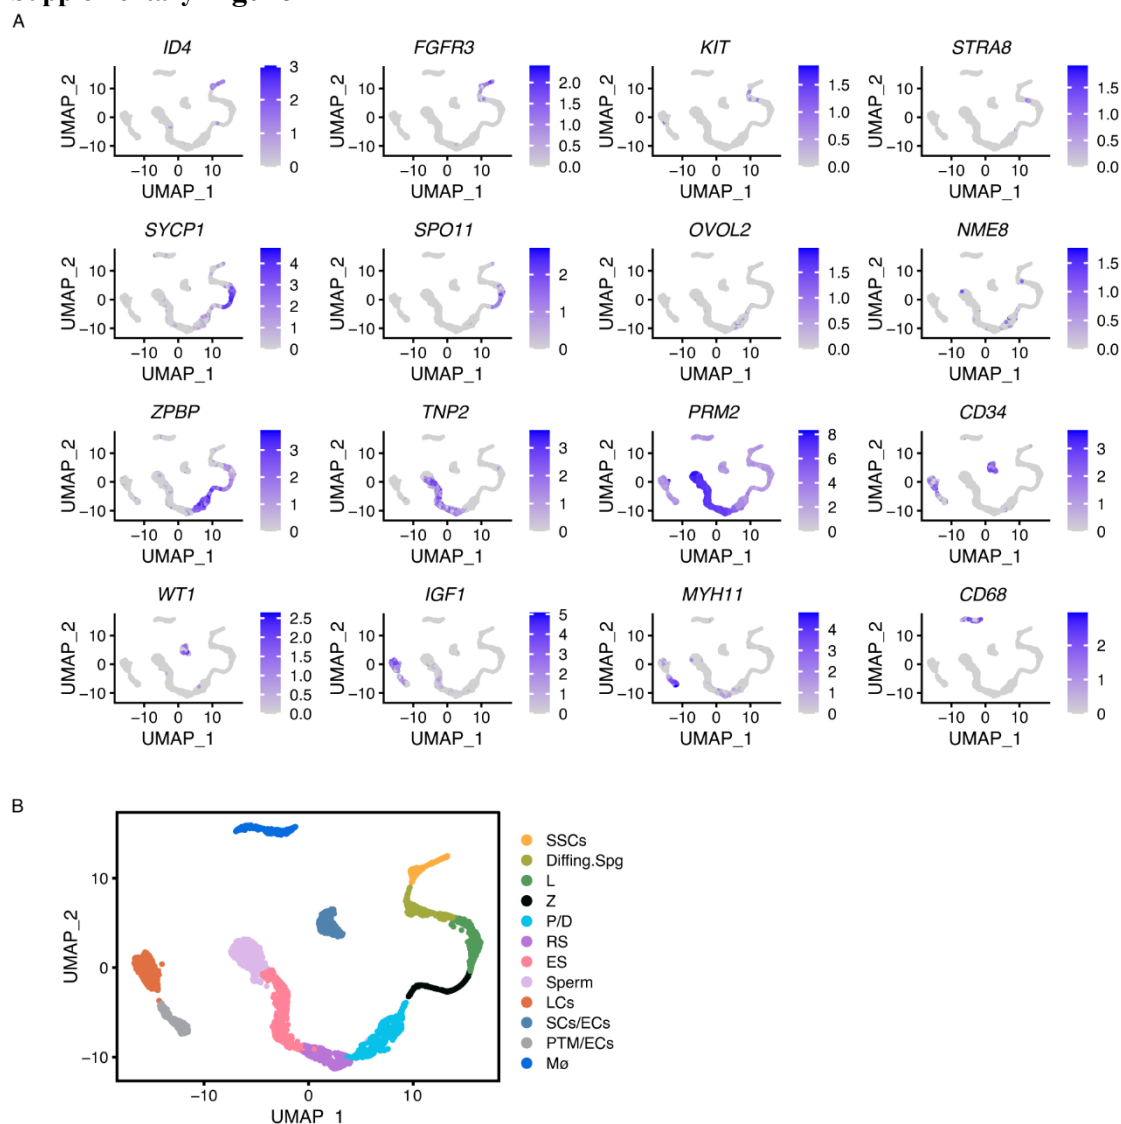

**Supplementary Figure 2. Expression patterns of selected markers are projected on the UMAP plot.** (A) UMAP plot showing expression patterns of selected markers. As shown on the figure key, blue indicates high expression, while gray indicates low or no expression. Spermatogonial stem cells are identified by *ID4* and *FGFR3*, *KIT* and *STRA8* are differentiating spermatogonia markers, *SYCP1*, *SPO11*, *OVOL2*, *NME8* and *ZBPB* are meiosis markers, *TNP2* and *PRM2* are spermatids and sperm markers, Endothelial cells are identified by *CD34*, *WT1* is a marker for Sertoli cells, *IGF1* is a marker for Leydig cells, Peritubular myoid cells are identified by *MYH11*, and macrophages are identified by *CD68*. (B) UMAP and clustering analysis of all human testicular cells.

### Supplementary Figure 3

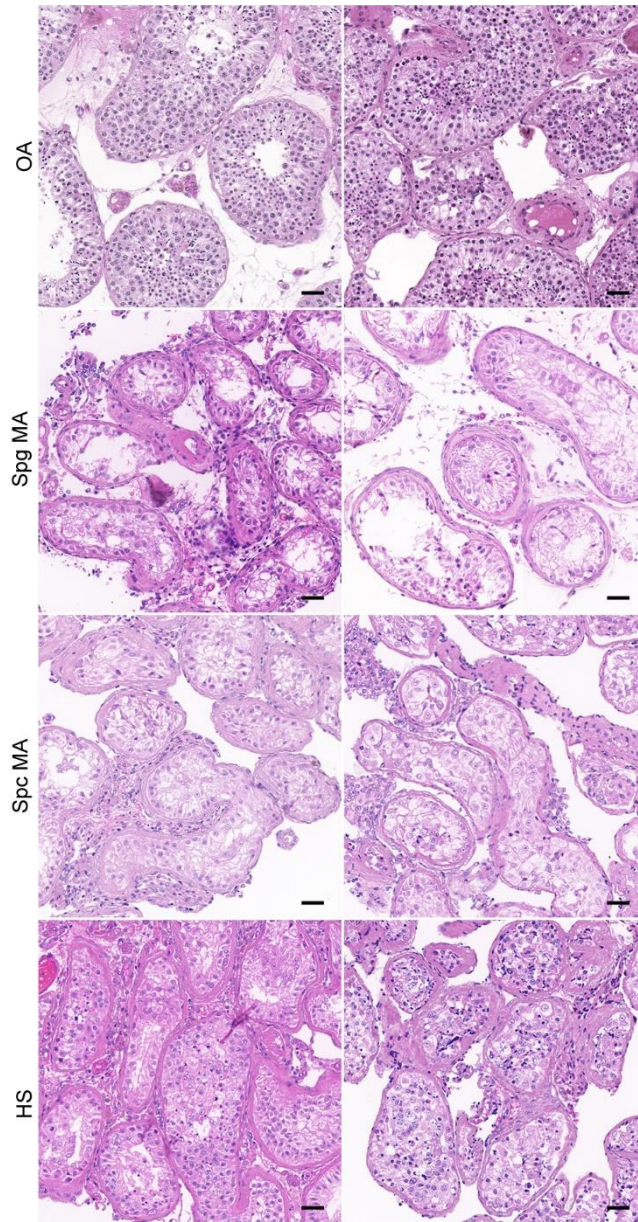

**Supplementary Figure 3: H&E staining for 8 testicular tissues with different spermatogenic statuses.** All samples were classified as OA, Spg MA, Spc MA, and HS according to the Johnsen score. Scale bars, 50 $\mu$ m.

**Supplementary Table 1.** Antibodies applied in Western blots, immunofluorescence and immunoprecipitation

| Antibodies                                    | Source                                 | Dilution | Incubation    |
|-----------------------------------------------|----------------------------------------|----------|---------------|
| <i>Western blot</i>                           |                                        |          |               |
| MAGEB2                                        | Sigma# HPA074544                       | 1:500    | 12h at 4°C    |
| PLZF                                          | SantaCruz cat#sc-28319                 | 1:1000   | 12h at 4°C    |
| PCNA                                          | Abcam cat#ab29                         | 1:500    | 12h at 4°C    |
| CCND1                                         | Sigma#SAB1405510                       | 1:800    | 12h at 4°C    |
| ACTB                                          | Cwbio cat#CW0096                       | 1:2000   | 12h at 4°C    |
| $\alpha$ -Tubulin                             | Sigma cat#T9026                        | 1:1000   | 12h at 4°C    |
| EGR1                                          | Sinobiological cat#100899              | 1:800    | 12h at 4°C    |
| <i>Immunoprecipitation</i>                    |                                        |          |               |
| FLAG                                          | Abcam cat#ab205606                     | 1:25     | 16h at 4°C    |
| <i>Immunofluorescence</i>                     |                                        |          |               |
| MAGEB2                                        | Sigma# HPA074544                       | 1:50     | 16h at 4°C    |
| DDX4                                          | Abcam cat#ab27591                      | 1:50     | 16h at 4°C    |
| GFR $\alpha$ 1                                | R&Dcat#AF560                           | 1:25     | 16h at 4°C    |
| PCNA                                          | Abcam cat#ab29                         | 1:50     | 12-16h at 4°C |
| KIT                                           | R&D cat#AF332                          | 1:25     | 16h at 4°C    |
| <i>Secondary Antibody</i>                     |                                        |          |               |
| Donkey anti-Rabbit<br>IgG, Alexa Fluor<br>488 | Thermo Fisher Scientific<br>cat#A21206 | 1:1000   | 1h at 25°C    |
| Donkey anti-Mouse<br>IgG, Alexa Fluor<br>594  | Thermo Fisher Scientific<br>cat#A21203 | 1:1000   | 1h at 25°C    |
| Donkey anti-Goat<br>IgG, Alexa Fluor<br>594   | Thermo Fisher Scientific<br>cat#A11058 | 1:1000   | 1h at 25°C    |
